# Supplementary material for: Combining semi-synthesis with plant and microbial biocatalysis: new frontiers in producing a chemical arsenal against cancer
Source: Royal Society of Chemistry journal article supplement (doi:10.1039/c8ra02184h), 2018-01-01
Supplement: c8ra02184h1.pdf [file c8ra02184h1.pdf]

**Table S1. UPLC-PDA-MS<sup>n</sup> identifying features of bromination reaction products and substrates.**

| Peak                              | $R_t$ (min) | $\lambda_{\max}$ (nm) | $[M - H]^-$ | $[M + H]^+$ | MS/MS fragments <sup>+</sup> ( $m/z$ ) |
|-----------------------------------|-------------|-----------------------|-------------|-------------|----------------------------------------|
| apigenin <sup>a</sup>             | 10.75       | 218, 267s, 335s       | 269.05      | 271.05      | 117.03                                 |
| genkwanin <sup>a</sup>            | 13.26       | 221, 267s, 334s       | 283.06      | 285.05      | 117.03                                 |
| 6,8-dibromogenkwanin <sup>b</sup> | 17.52       | 222, 275s, 332s       | 440.88      | 442.88      | 425.86                                 |
| tribromo-genkwanin                | 18.00       | 223, 272s, 331s       | 518.79      | 520.79      | 299.20                                 |
| bromo-genkwanin A                 | 15.28       | 220, 272s, 333s       | 360.97      | 362.97      | -                                      |
| bromo-genkwanin B                 | 16.12       | 221, 271s, 331s       | 360.97      | 362.97      | -                                      |
| 6,8-dibromoapigenin <sup>b</sup>  | 16.11       | 221, 276s, 332s       | 426.86      | 428.86      | -                                      |

<sup>a</sup>Peak identity based on comparison to an authentic standard.

<sup>b</sup>Identity based on exact mass and proton NMR.

**Table S2. <sup>1</sup>H Chemical Shifts (ppm) of Brominated Flavone Derivatives.**

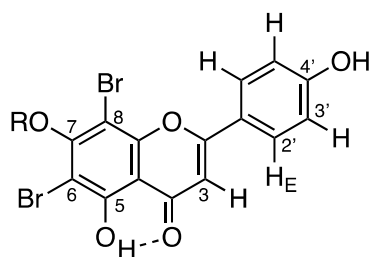

|                                                 | 3-H  | 5-OH               | 7-OR               | 4-OH               | 2'-H | 3'-H | $J_{2'3'}$ <sup>c</sup> |
|-------------------------------------------------|------|--------------------|--------------------|--------------------|------|------|-------------------------|
| 6,8-dibromo-apigenin<br>(R = H)                 | 6.73 | 13.80 <sup>a</sup> | 10.97 <sup>a</sup> | 10.97 <sup>a</sup> | 7.85 | 6.87 | 8.8                     |
| 6,8-dibromo-genkwanin<br>(R = CH <sub>3</sub> ) | 7.16 | 13.98 <sup>c</sup> | 3.97               | 10.59 <sup>c</sup> | 8.09 | 7.02 | 8.8                     |

Solvent DMSO-*d*<sub>6</sub>: a) broad singlet b) broad singlet; c) sharp singlet

**Table S3. Agilent 1290-QTRAP 5500 LC-MS<sup>n</sup> Settings**

Quantitation Table:

Period 1:

-----  
Scans in Period:3395  
Relative Start Time: 60000.00 msec  
Experiments in Period: 5

IDA Properties:

First Criteria:  
Intense peaks from 1 to 3  
Ions greater than: 260.000 m/z  
Ions smaller than: 730.000 m/z  
Which exceeds 5000.000 counts  
Rolling collision energy: No  
Exclude former target ions: Never  
Mass Tolerance: 250.000 mDa  
Exclude isotopes within 4.0 Da window  
Use Enhanced Resolution scan to confirm Charge State and/or Isotope Pattern selection: Yes  
Exclude 1+ precursors from Enhanced Resolution Scan confirmation and MS/MS:Yes  
Dynamic Background Subtraction:Yes

Period 1 Experiment 1:

-----  
Scan Type: Precursor Ion (Prec)  
Polarity: Negative  
Scan Mode: Profile  
Ion Source: Turbo Spray  
# Scans to Sum: 1  
Precursor Of: 80.90 Da  
Resolution Q1: Unit  
Resolution Q3: Unit  
Scan Rate: 1000 Da/s  
Intensity Thres.: 0.00 cps  
Settling Time: 0.0000 msec  
MR Pause: 5.0070 msec  
MCA: No  
Center/Width: No  
Step Size: 0.10 Da

| Start (Da) | Stop (Da) | Time (sec) | Param | Start | Stop |
|------------|-----------|------------|-------|-------|------|
| 260.00     | 730.00    | 0.47       |       |       |      |

Parameter Table(Period 1 Experiment 1)

CUR: 35.00  
IS: -4500.00  
TEM: 650.00

GS1: 60.00  
GS2: 60.00  
CAD: High  
DP -100.00  
EP -10.00  
CE -100.00  
CXP -15.00

Period 1 Experiment 2:

-----  
Scan Type: Enhanced Resolution (ER)  
Polarity: Negative  
Scan Mode: Profile  
Ion Source: Turbo Spray  
# Scans to Sum: 1  
Resolution Q1: Open  
Scan Rate: 250 Da/s  
Intensity Thres.: 0.00 cps  
Settling Time: 0.0000 msec  
MR Pause: 15.0000 msec  
Q0 trapping: No  
MCA: No  
Center/Width: Yes  
LIT fill time: 0.05 msec  
Dynamic Fill Time: On  
TIC Target EMS Scan: 10.00 x1e7 cps.  
TIC Target ER Scan: 1.00 x1e7 cps.  
TIC Target EPI Scan: 10.00 x1e7 cps.  
Max Fill EMS Scan: 150.000 msec  
Max Fill ER Scan: 250.000 msec  
Max Fill EPI Scan: 250.000 msec  
Min Fill EMS Scan: 0.050 msec  
Min Fill ER Scan: 0.050 msec  
Min Fill EPI Scan: 0.050 msec  
Default Fill EMS Scan: 0.050 msec  
Default Fill ER Scan: 0.050 msec  
Default Fill EPI Scan: 1.000 msec  
Q3 Entry Barrier: 8.00 V  
Step Size: 0.02 Da

| Start (Da) | Stop (Da) | Time (sec)    | Param | Start | Stop |
|------------|-----------|---------------|-------|-------|------|
| <Best ion> |           | AF3 0.08      | 0.08  |       |      |
|            | EXB       | 158.78 158.72 |       |       |      |

| Start (Da) | Stop (Da) | Time (sec)    | Param | Start | Stop |
|------------|-----------|---------------|-------|-------|------|
| <Best ion> |           | AF3 0.08      | 0.08  |       |      |
|            | EXB       | 158.78 158.72 |       |       |      |

| Start (Da) | Stop (Da) | Time (sec)    | Param | Start | Stop |
|------------|-----------|---------------|-------|-------|------|
| <Best ion> |           | AF3 0.08      | 0.08  |       |      |
|            | EXB       | 158.78 158.72 |       |       |      |

Parameter Table(Period 1 Experiment 2)

CUR: 35.00  
 IS: -4500.00  
 TEM: 650.00  
 GS1: 60.00  
 GS2: 60.00  
 CAD: High  
 DP -100.00  
 EP -10.00  
 CE -10.00  
 CES -0.00

Period 1 Experiment 3:

-----

Scan Type: Enhanced Product Ion (EPI)  
 Polarity: Negative  
 Scan Mode: Profile  
 Ion Source: Turbo Spray  
 # Scans to Sum: 1  
 Product Of: 30.00 Da  
 Resolution Q1: Unit  
 Scan Rate: 10000 Da/s  
 Intensity Thres.: 0.00 cps  
 Settling Time: 0.0000 msec  
 MR Pause: 1.5000 msec  
 Q0 trapping: No  
 MCA: No  
 Center/Width: No  
 LIT fill time: 1.00 msec  
 Dynamic Fill Time: On  
 TIC Target EMS Scan: 10.00 x1e7 cps.  
 TIC Target ER Scan: 1.00 x1e7 cps.  
 TIC Target EPI Scan: 10.00 x1e7 cps.  
 Max Fill EMS Scan: 150.000 msec  
 Max Fill ER Scan: 250.000 msec  
 Max Fill EPI Scan: 250.000 msec  
 Min Fill EMS Scan: 0.050 msec  
 Min Fill ER Scan: 0.050 msec  
 Min Fill EPI Scan: 0.050 msec  
 Default Fill EMS Scan: 0.050 msec  
 Default Fill ER Scan: 0.050 msec  
 Default Fill EPI Scan: 1.000 msec

Q3 Entry Barrier: 8.00 V  
Step Size: 0.12 Da

| Start (Da) | Stop (Da) | Time (sec) | Param | Start  | Stop   |
|------------|-----------|------------|-------|--------|--------|
| 50.00      | 102.87    | 0.0053     | AF3   | 2.98   | 3.06   |
|            |           |            | EXB   | 155.79 | 153.89 |

| Start (Da) | Stop (Da) | Time (sec) | Param | Start  | Stop   |
|------------|-----------|------------|-------|--------|--------|
| 102.87     | 308.63    | 0.0206     | AF3   | 3.06   | 3.40   |
|            |           |            | EXB   | 153.89 | 146.52 |

| Start (Da) | Stop (Da) | Time (sec) | Param | Start  | Stop   |
|------------|-----------|------------|-------|--------|--------|
| 308.63     | 730.00    | 0.0421     | AF3   | 3.40   | 4.10   |
|            |           |            | EXB   | 146.52 | 131.41 |

Parameter Table(Period 1 Experiment 3)

CUR: 35.00  
IS: -4500.00  
TEM: 650.00  
GS1: 60.00  
GS2: 60.00  
CAD: High  
DP -100.00  
EP -10.00  
CE -100.00  
CES 40.00

Period 1 Experiment 4:

-----  
Scan Type: Enhanced Product Ion (EPI)  
Polarity: Negative  
Scan Mode: Profile  
Ion Source: Turbo Spray  
# Scans to Sum: 1  
Product Of: 30.00 Da  
Resolution Q1: Unit  
Scan Rate: 10000 Da/s  
Intensity Thres.: 0.00 cps  
Settling Time: 0.0000 msec  
MR Pause: 1.5000 msec  
Q0 trapping: No  
MCA: No  
Center/Width: No  
LIT fill time: 1.00 msec  
Dynamic Fill Time: On

TIC Target EMS Scan: 10.00 x1e7 cps.  
 TIC Target ER Scan: 1.00 x1e7 cps.  
 TIC Target EPI Scan: 10.00 x1e7 cps.  
 Max Fill EMS Scan: 150.000 msec  
 Max Fill ER Scan: 250.000 msec  
 Max Fill EPI Scan: 250.000 msec  
 Min Fill EMS Scan: 0.050 msec  
 Min Fill ER Scan: 0.050 msec  
 Min Fill EPI Scan: 0.050 msec  
 Default Fill EMS Scan: 0.050 msec  
 Default Fill ER Scan: 0.050 msec  
 Default Fill EPI Scan: 1.000 msec  
 Q3 Entry Barrier: 8.00 V  
 Step Size: 0.12 Da

| Start (Da) | Stop (Da) | Time (sec) | Param | Start  | Stop   |
|------------|-----------|------------|-------|--------|--------|
| 50.00      | 102.87    | 0.0053     | AF3   | 2.98   | 3.06   |
|            |           |            | EXB   | 155.79 | 153.89 |

| Start (Da) | Stop (Da) | Time (sec) | Param | Start  | Stop   |
|------------|-----------|------------|-------|--------|--------|
| 102.87     | 308.63    | 0.0206     | AF3   | 3.06   | 3.40   |
|            |           |            | EXB   | 153.89 | 146.52 |

| Start (Da) | Stop (Da) | Time (sec) | Param | Start  | Stop   |
|------------|-----------|------------|-------|--------|--------|
| 308.63     | 730.00    | 0.0421     | AF3   | 3.40   | 4.10   |
|            |           |            | EXB   | 146.52 | 131.41 |

Parameter Table(Period 1 Experiment 4)

CUR: 35.00  
 IS: -4500.00  
 TEM: 650.00  
 GS1: 60.00  
 GS2: 60.00  
 CAD: High  
 DP -100.00  
 EP -10.00  
 CE -100.00  
 CES 40.00

Period 1 Experiment 5:

-----  
 Scan Type: Enhanced Product Ion (EPI)  
 Polarity: Negative  
 Scan Mode: Profile  
 Ion Source: Turbo Spray

# Scans to Sum: 1  
 Product Of: 30.00 Da  
 Resolution Q1: Unit  
 Scan Rate: 10000 Da/s  
 Intensity Thres.: 0.00 cps  
 Settling Time: 0.0000 msec  
 MR Pause: 1.5000 msec  
 Q0 trapping: No  
 MCA: No  
 Center/Width: No  
 LIT fill time: 1.00 msec  
 Dynamic Fill Time: On  
 TIC Target EMS Scan: 10.00 x1e7 cps.  
 TIC Target ER Scan: 1.00 x1e7 cps.  
 TIC Target EPI Scan: 10.00 x1e7 cps.  
 Max Fill EMS Scan: 150.000 msec  
 Max Fill ER Scan: 250.000 msec  
 Max Fill EPI Scan: 250.000 msec  
 Min Fill EMS Scan: 0.050 msec  
 Min Fill ER Scan: 0.050 msec  
 Min Fill EPI Scan: 0.050 msec  
 Default Fill EMS Scan: 0.050 msec  
 Default Fill ER Scan: 0.050 msec  
 Default Fill EPI Scan: 1.000 msec  
 Q3 Entry Barrier: 8.00 V  
 Step Size: 0.12 Da

| Start (Da) | Stop (Da) | Time (sec) | Param | Start  | Stop   |
|------------|-----------|------------|-------|--------|--------|
| 50.00      | 102.87    | 0.0053     | AF3   | 2.98   | 3.06   |
|            |           |            | EXB   | 155.79 | 153.89 |

| Start (Da) | Stop (Da) | Time (sec) | Param | Start  | Stop   |
|------------|-----------|------------|-------|--------|--------|
| 102.87     | 308.63    | 0.0206     | AF3   | 3.06   | 3.40   |
|            |           |            | EXB   | 153.89 | 146.52 |

| Start (Da) | Stop (Da) | Time (sec) | Param | Start  | Stop   |
|------------|-----------|------------|-------|--------|--------|
| 308.63     | 730.00    | 0.0421     | AF3   | 3.40   | 4.10   |
|            |           |            | EXB   | 146.52 | 131.41 |

Parameter Table(Period 1 Experiment 5)

CUR: 35.00  
 IS: -4500.00  
 TEM: 650.00  
 GS1: 60.00  
 GS2: 60.00  
 CAD: High  
 DP -100.00



EP -10.00  
CE -100.00  
CES 40.00

Resolution tables

Quad 1 Negative Unit Scan Speed = 1000 Da/s  
Last Modification Date Time: June 20, 2012 12:07:02

IE1 -0.500  
Mass (Da) Offset Value  
44.998 -0.042  
411.259 0.119  
585.385 0.200  
933.636 0.315

Quad 3 Negative Low Scan Speed = 10 Da/s  
Last Modification Date Time: August 13, 2013 09:56:00

Mass (Da) Offset Value  
44.998 -0.450  
411.259 -1.160  
585.385 -1.515  
933.636 -2.212

Quad 3 Negative Unit Scan Speed = 10 Da/s  
Last Modification Date Time: December 27, 2012 14:14:08

IE3 0.000  
Mass (Da) Offset Value  
44.998 -0.150  
411.259 -0.860  
585.385 -1.215  
933.636 -1.912

Calibration tables

Quad 1 Negative Unit Resolution Scan Speed = 10 Da/s  
Last Modification Date Time: December 28, 2012 10:35:40

Mass (Da) Dac Value  
44.998 8087  
585.385 106766  
933.636 170369

Quad 1 Negative Unit Resolution Scan Speed = 1000 Da/s  
Last Modification Date Time: December 28, 2012 10:46:48

| Mass (Da) | Dac Value |
|-----------|-----------|
| 44.998    | 8115      |
| 411.259   | 75034     |
| 585.385   | 106853    |
| 933.636   | 170471    |

Quad 3 Negative      Unit Resolution Scan Speed = 10 Da/s  
Last Modification Date Time: December 27, 2012 14:14:34

| Mass (Da) | Dac Value |
|-----------|-----------|
| 44.998    | 8183      |
| 411.259   | 75808     |
| 585.385   | 107961    |
| 933.636   | 172261    |

Quad 3 Negative      Unit Resolution Scan Speed = 2000 Da/s  
Last Modification Date Time: June 20, 2012 12:19:58

| Mass (Da) | Dac Value |
|-----------|-----------|
| 44.998    | 8222      |
| 411.259   | 75883     |
| 585.385   | 108047    |
| 933.636   | 172388    |

Quad 3 Negative      Scan Speed = 250 Da/s  
Last Modification Date Time: June 20, 2012 14:59:12

| Mass (Da) | Dac Value |
|-----------|-----------|
| 112.985   | 24976     |
| 431.982   | 95599     |
| 601.978   | 133225    |

Quad 3 Negative      Scan Speed = 10000 Da/s  
Last Modification Date Time: June 20, 2012 15:36:46

| Mass (Da) | Dac Value |
|-----------|-----------|
| 112.985   | 25058     |
| 431.982   | 95853     |
| 601.978   | 133532    |

Instrument Parameters:  
Detector Parameters (Negative):  
CEM 2200.0
